# Supplementary material for: The sol–gel autocombustion as a route towards highly CO2-selective, active and long-term stable Cu/ZrO2 methanol steam reforming catalysts
Source: Mater Chem Front. 2021 May 20;5(13):5093–105. doi: 10.1039/d1qm00641j (PMC8238116; doi:10.1039/d1qm00641j)
Supplement: QM-005-D1QM00641J-s001 [file QM-005-D1QM00641J-s001.pdf]

## Supporting Information

### **The sol-gel autocombustion as a route towards highly CO<sub>2</sub>-selective, active and long-term stable Cu/ZrO<sub>2</sub> methanol steam reforming catalysts**

Kevin Ploner<sup>1</sup>, Parastoo Delir Kheyrollahi Nezhad<sup>1</sup>, Albert Gili<sup>2,3</sup>, Franz Kamutzki<sup>2</sup>,  
Aleksander Gurlo<sup>2</sup>, Andrew Doran<sup>4</sup>, Pengfei Cao<sup>5</sup>, Marc Heggen<sup>5</sup>, Nicolas Köwitsch<sup>6</sup>, Marc  
Armbrüster<sup>6</sup>, Maximilian Watschinger<sup>1</sup>, Bernhard Klötzer<sup>1</sup> and Simon Penner<sup>1,\*</sup>

<sup>1</sup>*Department of Physical Chemistry, University of Innsbruck, Innrain 52c, A-6020 Innsbruck*

<sup>2</sup>*Chair of Advanced Ceramic Materials, Institut für Werkstoffwissenschaften und -  
technologien, Technical University Berlin, Hardenbergstr. 40, D-10623 Berlin, Germany*

<sup>3</sup>*Institute of Chemistry, Technical University Berlin, Sekretariat TC 8, Straße des 17. Juni  
124, D-10623 Berlin, Germany*

<sup>4</sup>*Advanced Light Source, Lawrence Berkeley National Laboratory, Berkeley, California  
94720, USA*

<sup>5</sup>*Ernst Ruska-Centre for Microscopy and Spectroscopy with Electrons, Forschungszentrum  
Jülich GmbH, Leo-Brandt-Str. 1, D-52428 Jülich, Germany*

<sup>6</sup>*Faculty of Natural Sciences, Institute of Chemistry, Materials for Innovative Energy  
Concepts, Technical University Chemnitz, Straße der Nationen 62, D-09111 Chemnitz,  
Germany*

**Keywords:** amorphous zirconia, tetragonal zirconia, monoclinic zirconia, copper, catalyst  
morphology

\*Corresponding Author: [simon.penner@uibk.ac.at](mailto:simon.penner@uibk.ac.at), Tel: 004351250758003

## 1. Detailed experimental

### 1.1. *Ex situ* X-ray diffraction

The *ex situ* powder X-ray diffraction experiments were conducted on a Stadi P diffractometer (STOE & Cie GmbH, Darmstadt, Germany) in transmission geometry equipped with a MYTHEN2 DCS6 detector system (DECTRIS Ltd., Switzerland). A Mo X-ray tube (GE Sensing & Inspection Technologies GmbH, Ahrensburg, Germany) operated with 40 mA and 50 kV in combination with a curved Ge(111) monochromator crystal provided the Mo-K $_{\alpha 1}$  radiation with a wavelength of 0.7093 Å. The evaluation of the diffractograms was performed using the WinX<sup>POW</sup> software<sup>1</sup> and phase assignment was accomplished with references retrieved from the ICDD database<sup>2</sup>.

### 1.2. Calculation of the turnover frequency

The turnover frequency (TOF) can be calculated *via* differentiation of the partial pressures with respect to the time and consecutive application of the ideal gas law, yielding the rates in molar amounts per time. Further multiplication with Avogadro's number and normalisation to the number of accessible active sites yields the TOF in s<sup>-1</sup>. Since the nature of the active site in Cu-based MSR catalysts is still under debate<sup>3</sup>, the number of accessible copper surface atoms is assumed to be a reasonable estimate for this parameter. This value is computed utilizing the results of the dissociative N<sub>2</sub>O adsorption, which provides the specific copper surface area. Assuming an equal distribution of the Cu(100), Cu(110) and Cu(111) surface planes, Evans *et al.*<sup>4</sup> supply the surface atom density of copper ( $= 1.46 \cdot 10^{19} \text{ m}^{-2}$ ), thus, allowing the estimation of the TOF (see Equation S1).

$$TOF (s^{-1}) = \frac{r * V * N_A}{R * T * SA_{Cu} * SD_{Cu} * m_{Cat}} \quad \text{Equation S1}$$

with TOF = turnover frequency (in  $s^{-1}$ ),  $r$  = formation rate of a product (in  $Pa s^{-1}$ ),  $V$  = volume of the reactor ( $= 13.8 \cdot 10^{-6} m^3$ ),  $N_A$  = Avogadro's number ( $= 6.022 \cdot 10^{23} mol^{-1}$ ),  $R$  = ideal gas constant ( $= 8.3145 J mol^{-1} K^{-1}$ ),  $T$  = temperature in the reactor ( $= 373 K$ , as other temperature-induced effects are considered via the Ar correction),  $SA_{Cu}$  = specific Cu surface area (in  $m^2 g_{Cat}^{-1}$ ),  $SD_{Cu}$  = atom surface density of Cu ( $= 1.46 \cdot 10^{19} m^{-2}$ )<sup>4</sup>,  $m_{Cat}$  = mass of catalyst used in the analysis (in g).

### 1.3. X-ray photoelectron spectroscopy (XPS)

The XPS experiments were conducted with a Thermo Scientific MultiLab 2000 spectrometer equipped with a monochromatic Al  $K_{\alpha}$  X-ray gun and an Alpha 110 hemispherical sector analyser. The base pressure is kept in the low  $10^{-9}$  mbar range and electrons with a kinetic energy of 6 eV are applied to the sample by a flood gun for charge compensation.

For quantitative determination of the Cu/Zr ratio, high-resolution spectra of the Zr 3d and the Cu 2p<sub>3/2</sub> regions with a pass energy of 20 eV and an energy step size of 0.05 eV are recorded. A Shirley-type function is employed for description of the background. In addition to the relative sensitivity factors (RSFs)<sup>5</sup>, the predictive G1 formula according to Gries<sup>6</sup> was utilised to account for different inelastic mean free paths for quantification. For qualitative comparison with the measured spectra, various Cu species were measured as reference samples using the same instrument, including metallic Cu (sputter-cleaned Cu foil, Goodfellow,  $\geq 99.99\%$ ), Cu<sub>2</sub>O (Sigma-Aldrich, anhydrous,  $\geq 99.99\%$  trace metals basis), CuO (Sigma-Aldrich, 99.999% trace metals basis) and Cu(OH)<sub>2</sub> (synthesized by precipitation with CuSO<sub>4</sub> · 5 H<sub>2</sub>O (Merck, for analysis, 99.7%) and NaOH (Roth,  $\geq 99\%$ )).

## 2. Images of the investigated samples

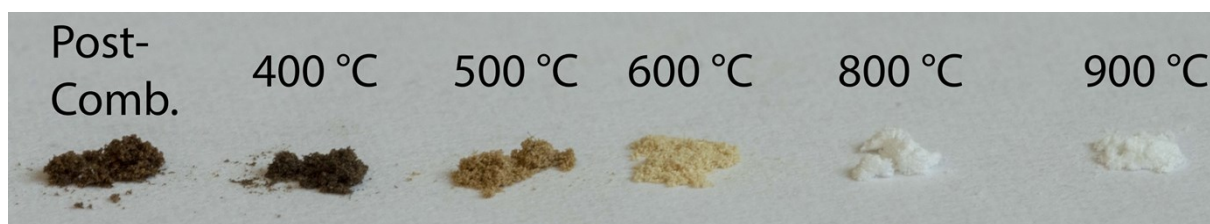

**Figure S1:** Picture of the pure  $\text{ZrO}_2$  precursor after combustion and after different calcination treatments.

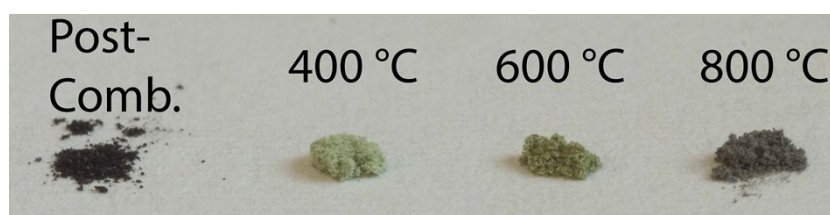

**Figure S2:** Picture of the  $\text{Cu/ZrO}_2$  precursor with 10 mol% Cu after combustion and after calcination at different temperatures.

### 3. Confirmation of the specific copper surface area with X-ray photoelectron spectroscopy (XPS)

Based on these measurements, the atomic Cu/Zr surface ratio after calcination was determined (see Table S1). From these values, the Cu surface fraction can be calculated and multiplied by the specific BET surface area to receive an estimate of the specific Cu surface area, which is compared with the values obtained with dissociative N<sub>2</sub>O adsorption in Table S1.  $SA_{Cu}(XPS)$  confirms the magnitude of  $SA_{Cu}(N_2O)$ , but also reflects the trend of the BET surface area, where CZ400 exhibits the highest value. Additionally, the determination of the Cu/Zr ratio with XPS is most reliable in a homogeneous sample, which is not given as soon as particles are formed. Therefore, the  $SA_{Cu}(XPS)$  would be underestimated in CtZ600 and CmZ800, where particle formation is visible with TEM. Furthermore, the surface Cu/Zr ratio increases in all samples after four MSR cycles, confirming that the MSR mixture is more efficient in extracting Cu from the Cu<sub>x</sub>Zr<sub>y</sub>O<sub>z</sub> phase than mere reductive treatments in H<sub>2</sub>. Since the BET surface area might change upon MSR, the  $SA_{Cu}(XPS)$  after catalysis are not calculated.

**Table S1:** Comparison of  $SA_{Cu}$  obtained with dissociative N<sub>2</sub>O adsorption or XPS in combination with the BET surface area.

|                                                                                  | CZ400 | CtZ600 | CmZ800 |
|----------------------------------------------------------------------------------|-------|--------|--------|
| BET surface area / m <sup>2</sup> g <sub>Cat</sub> <sup>-1</sup>                 | 32    | 7      | 2      |
| $SA_{Cu}(N_2O)$ / m <sup>2</sup> g <sub>Cat</sub> <sup>-1</sup>                  | 1.9   | 7.6    | 0.86   |
| Atomic Cu/Zr surface ratio from XPS after calcination                            | 0.19  | 0.23   | 0.29   |
| $SA_{Cu}(XPS)$ after calcination / m <sup>2</sup> g <sub>Cat</sub> <sup>-1</sup> | 5.2   | 1.3    | 0.45   |
| Atomic Cu/Zr surface ratio from XPS after MSR                                    | 0.65  | 0.38   | 0.79   |

The XP spectra of the Cu 2p and Cu LMM regions of the samples are depicted in Figure S3 and the corresponding spectra of the Zr 3d region in Figure S4 panel A with the fits of the latter being visualised in Figure S4 panel B.

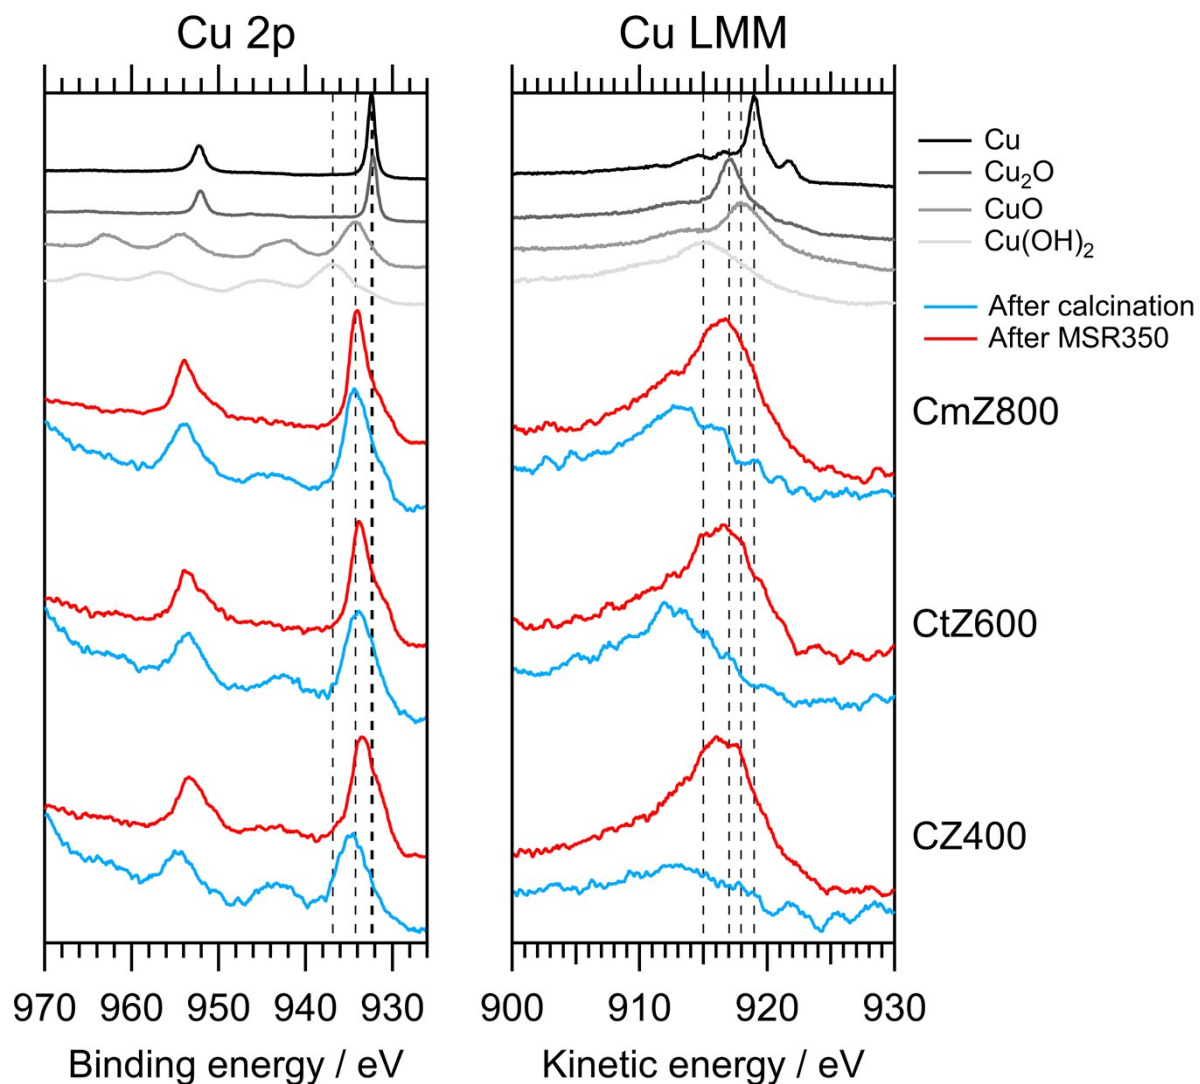

**Figure S3:** Cu 2p and Cu LMM regions of *ex situ* collected XP spectra of CZ400, CtZ600 and CmZ800 after calcination and after four MSR cycles. Reference spectra of Cu, Cu<sub>2</sub>O, CuO and Cu(OH)<sub>2</sub> are visualized at the top. The sample spectra were smoothed to enhance the visibility of characteristic features.

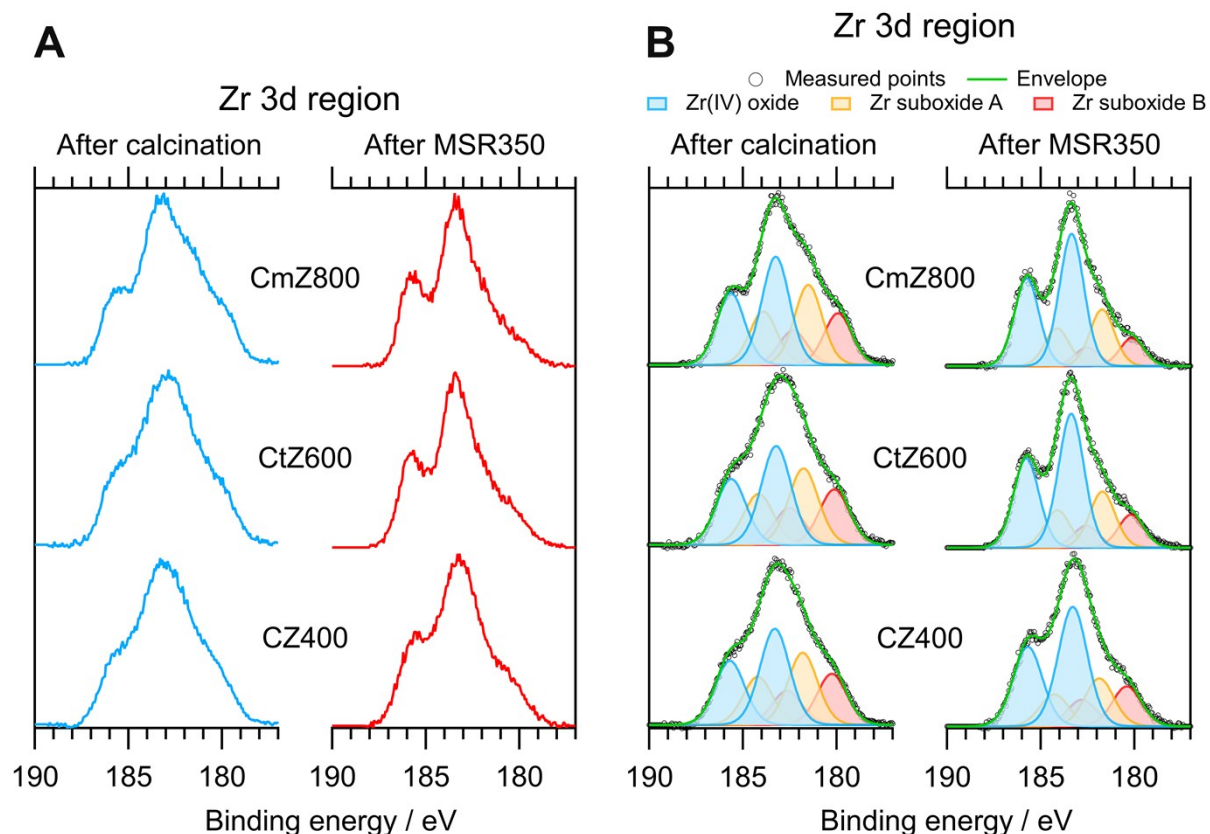

**Figure S4:** Panel A: Zr 3d region of *ex situ* collected XP spectra of CZ400, CtZ600 and CmZ800 after calcination and after four MSR cycles. Panel B: Fits of the same spectra in the Zr 3d region with the following constraints: Same full width at half maximum (FWHM) for all components; spin-orbit splitting of  $3d_{5/2}$  and  $3d_{3/2}$  of 2.4 eV for each species according to Nishino *et al.*<sup>7</sup>; area ratio of  $3d_{5/2}:3d_{3/2} = 3:2$  for each species.

**Table S2:** Surface concentration of Zr species after calcination and after four MSR cycles according to the fits in Figure S4 panel B.

| Sample | Surface concentration after calcination / at% |               |               | Surface concentration after MSR / at% |               |               |
|--------|-----------------------------------------------|---------------|---------------|---------------------------------------|---------------|---------------|
|        | Zr(IV) oxide                                  | Zr suboxide A | Zr suboxide B | Zr(IV) oxide                          | Zr suboxide A | Zr suboxide B |
| CZ400  | 44                                            | 33            | 23            | 58                                    | 23            | 19            |
| CtZ600 | 43                                            | 33            | 24            | 60                                    | 25            | 15            |
| CmZ800 | 45                                            | 34            | 21            | 61                                    | 26            | 13            |

#### 4. *Ex situ* and *in situ* X-ray diffraction

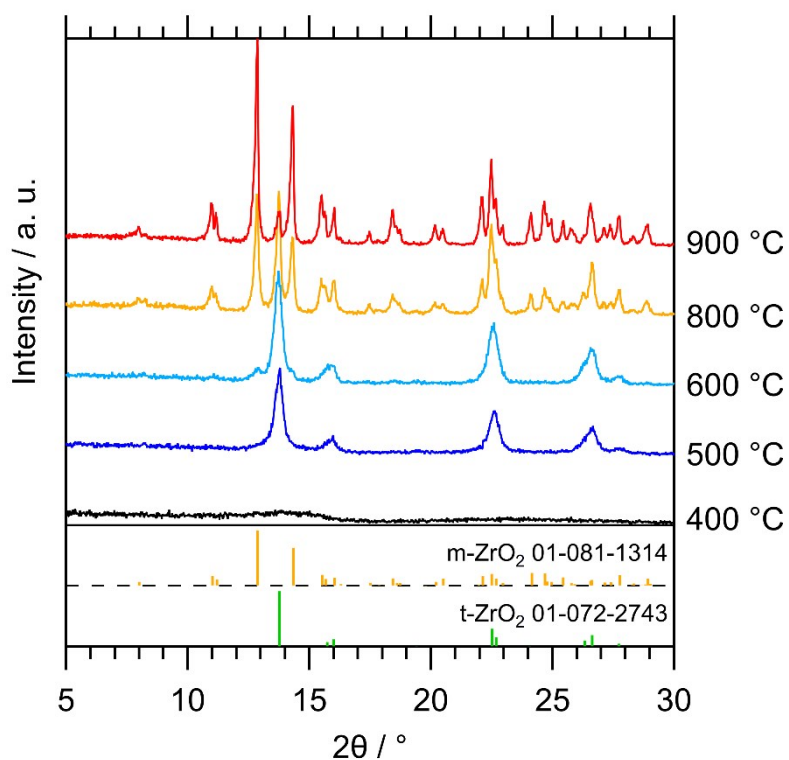

**Figure S5:** *Ex situ* XRD patterns of the pure ZrO<sub>2</sub> precursor calcined at different temperatures from 400 °C to 900 °C. The polymorph can be tuned from amorphous over tetragonal to monoclinic zirconia (with remnants of t-ZrO<sub>2</sub>). The patterns were recorded utilizing Mo K<sub>α1</sub> radiation ( $\lambda = 0.7093$  Å). References were taken from the ICDD database.<sup>2,8,9</sup>

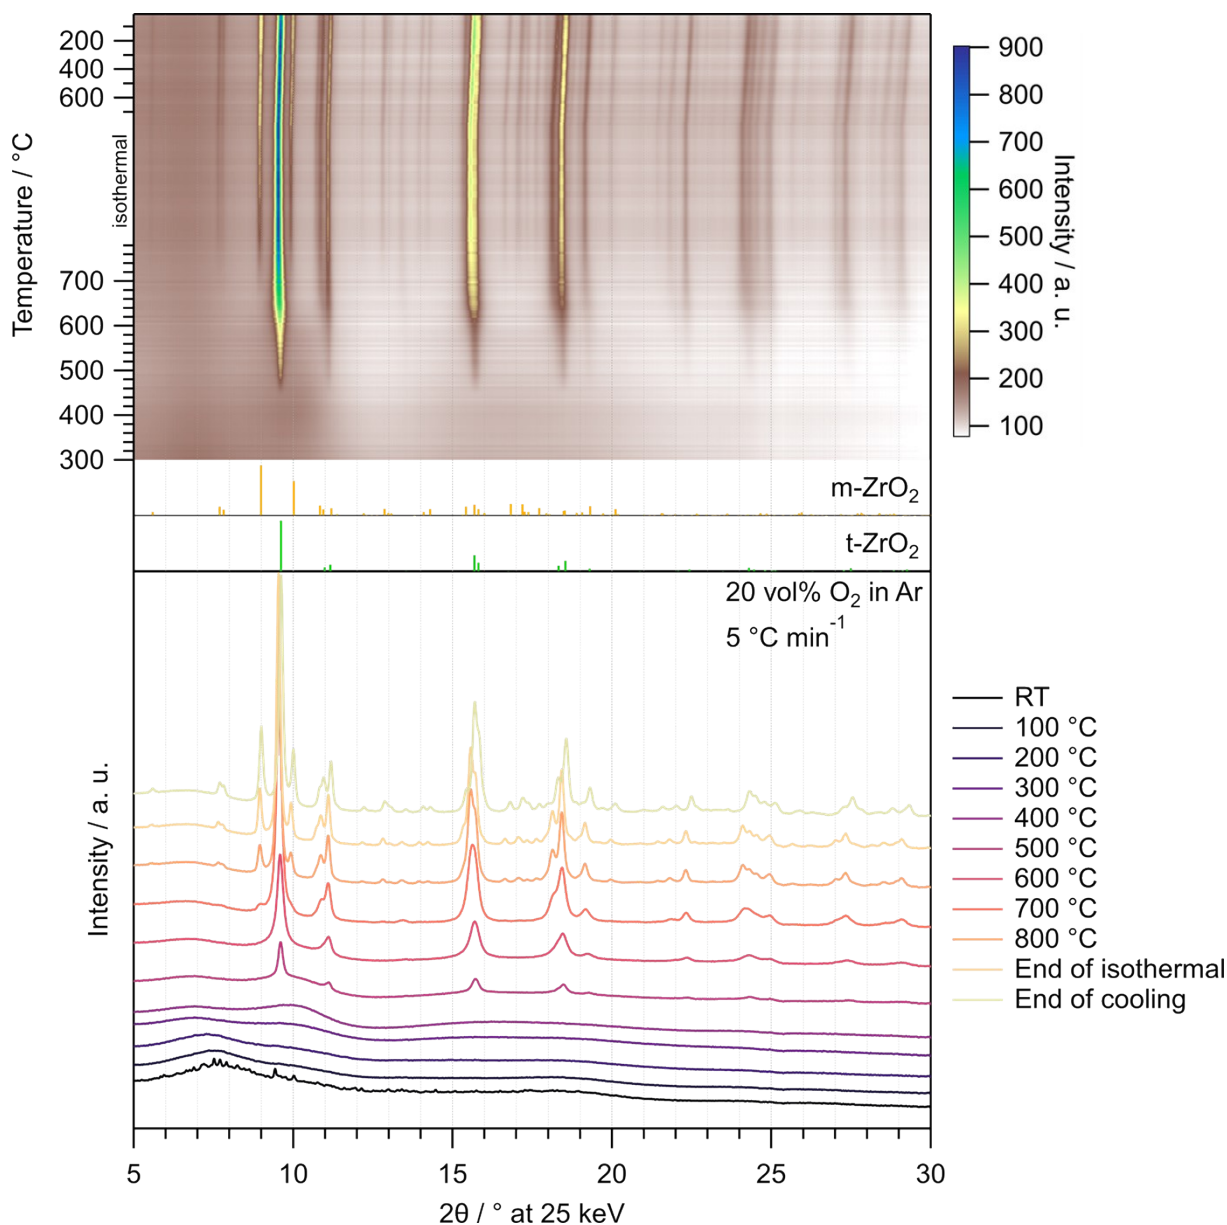

**Figure S6:** Temperature-resolved *in situ* XRD investigation of the calcination of the pure  $\text{ZrO}_2$  precursor after combustion in 20 vol%  $\text{O}_2$  in Ar with a heating rate of  $5\text{ }^\circ\text{C min}^{-1}$  between  $25\text{ }^\circ\text{C}$  and  $800\text{ }^\circ\text{C}$ . In the uppermost panel, the entire treatment consisting of heating to  $800\text{ }^\circ\text{C}$  (depicted from  $300\text{ }^\circ\text{C}$ ), an isothermal period of 30 min and cooling to  $25\text{ }^\circ\text{C}$  with  $20\text{ }^\circ\text{C min}^{-1}$  is illustrated as a heat map. Selected diffractograms are depicted in the bottom panel. The patterns were recorded utilizing synchrotron radiation at  $25\text{ keV}$  ( $\lambda = 0.4959\text{ \AA}$ ). References were taken from the ICDD database.<sup>2,8,9</sup>

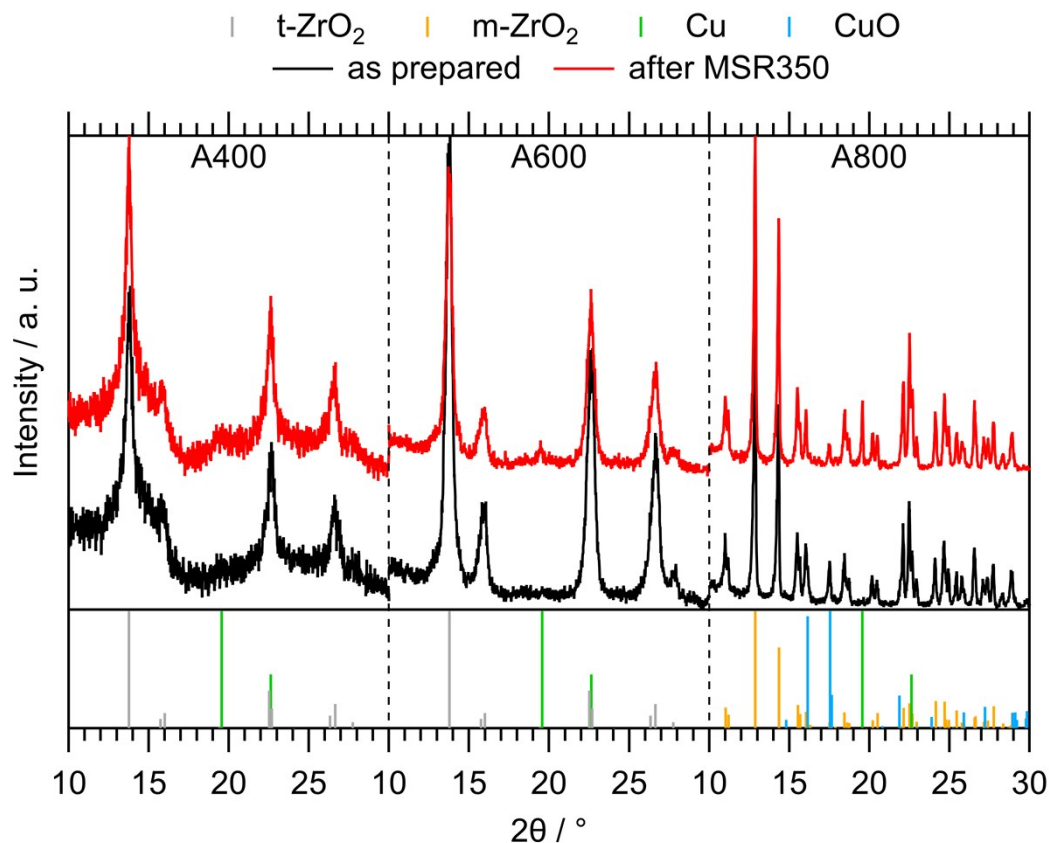

**Figure S7:** *Ex situ* XRD patterns of the Cu/ZrO<sub>2</sub> samples calcined at different temperatures from 400 °C to 800 °C after calcination (black traces) and after two MSR350 cycles (red traces). The polymorph of zirconia can be tuned from mostly amorphous (A400) to tetragonal (A600) and monoclinic (A800). CuO is only visible in A800 after calcination, whereas A400 and A600 do not exhibit significant reflections of any copper phase. After MSR350, all three systems display the presence of metallic copper. The patterns were recorded utilizing Mo K<sub>α1</sub> radiation ( $\lambda = 0.7093 \text{ \AA}$ ). The references were taken from the ICDD database.<sup>2,8–11</sup>

## 5. MSR on pure $\text{ZrO}_2$ in the recirculating batch reactor including a comparison with the Cu-containing samples

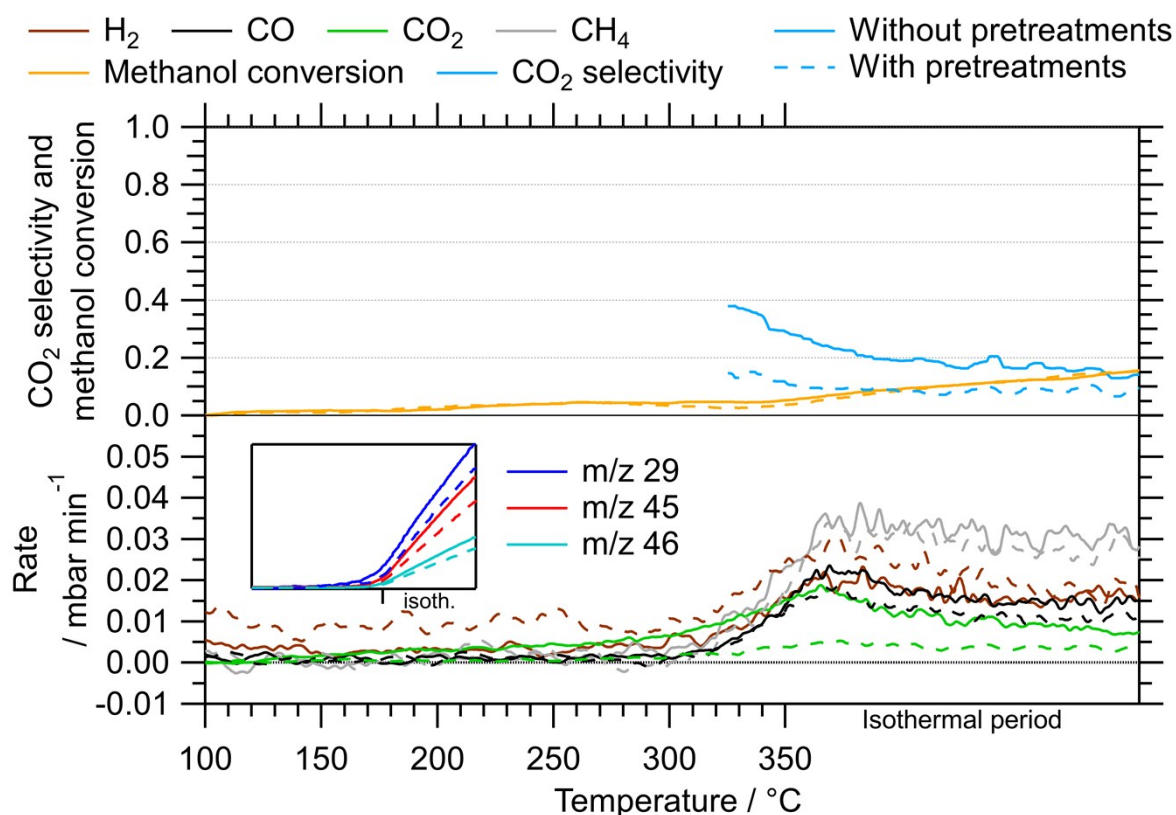

**Figure S8:** MSR profiles of pure  $\text{ZrO}_2$  calcined at 400 °C for 2 h between 100 °C and 350 °C including an isothermal period of 30 min. Colour code: orange – methanol conversion, blue – CO<sub>2</sub> selectivity calculated from the formation rates in mbar min<sup>-1</sup>, formation rates of brown: H<sub>2</sub>, black: CO, green: CO<sub>2</sub>, grey: CH<sub>4</sub>. The inset depicts the signal (partial pressure) increase of species with mass-to-charge ratios of 29, 45 and 46, which fits the fragmentation pattern of formic acid. The total signal height is comparable to the one of CH<sub>4</sub>. Heating rate: 5 °C min<sup>-1</sup>; sample mass: 19.0 mg.

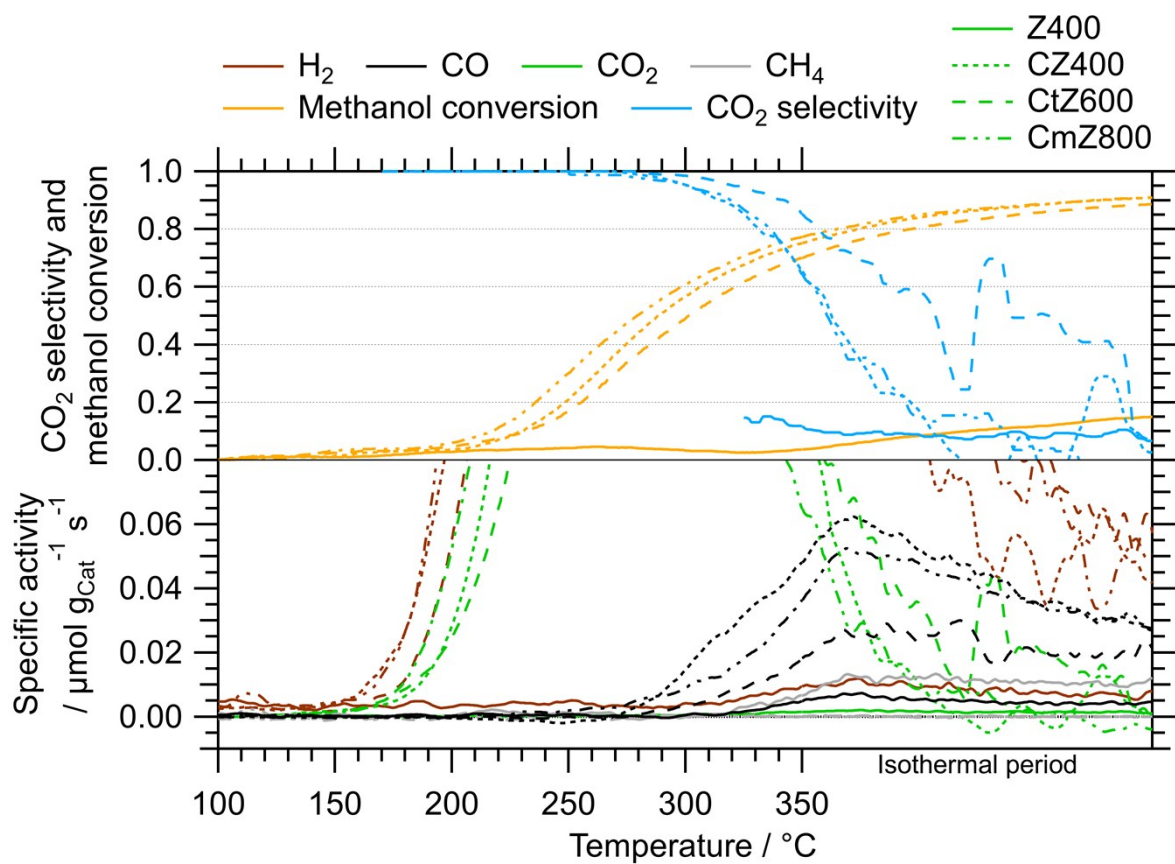

**Figure S9:** MSR profiles of Z400, CZ400, CtZ600 and CmZ800 between 100 °C and 350 °C including an isothermal period of 30 min. Colour code: orange – methanol conversion, blue – CO<sub>2</sub> selectivity calculated from the specific activities in  $\mu\text{mol g}_{\text{Cat}}^{-1} \text{s}^{-1}$ , specific activity of brown: H<sub>2</sub>, black: CO, green: CO<sub>2</sub>, grey: CH<sub>4</sub>. Heating rate: 5 °C min<sup>-1</sup>; sample mass: Z400 – 19.0 mg, CZ400 – 18.6 mg, CtZ600 – 21.6 mg, CmZ800 – 20.2 mg.

## 6. MSR in the continuous flow reactor

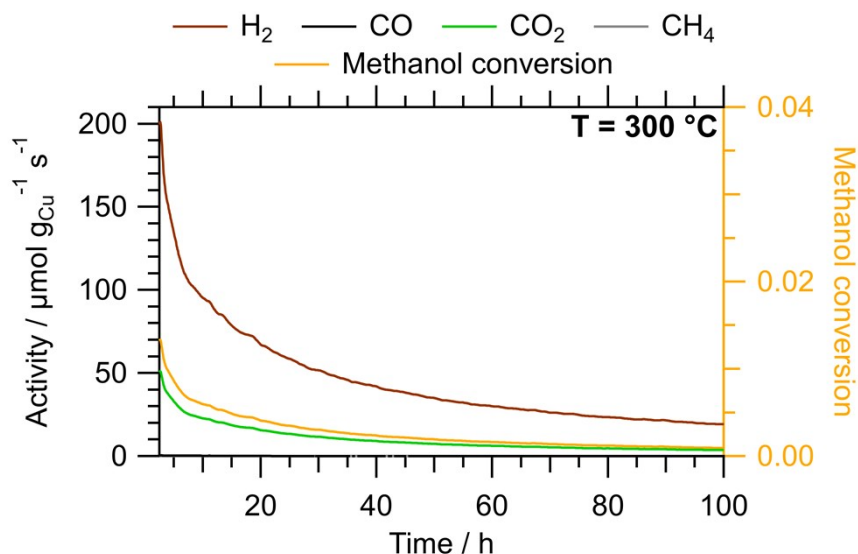

**Figure S10:** Isothermal long-term MSR test of CtZ600 at 300 °C in a continuous flow reactor with a GHSV of 1750 h<sup>-1</sup>. Colour code: orange – methanol conversion, specific activity of brown: H<sub>2</sub>, black: CO, green: CO<sub>2</sub>, grey: CH<sub>4</sub>. Due to the deactivation, the activity towards CO formation drops below the detection limit of the GC, rendering the determination of the CO<sub>2</sub> selectivity impossible. Sample mass: 40.1 mg.

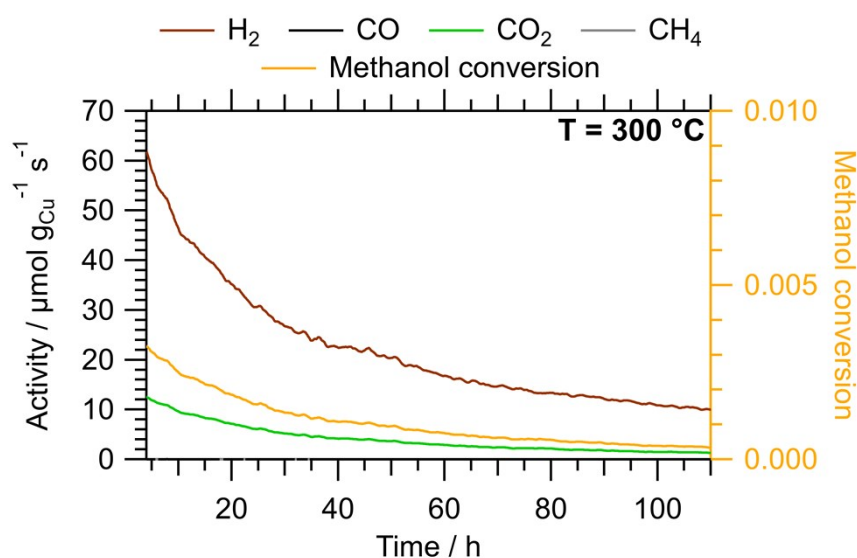

**Figure S11:** Isothermal long-term MSR test of CmZ800 at 300 °C in a continuous flow reactor with a GHSV of 1750 h<sup>-1</sup>. Colour code: orange – methanol conversion, specific activity of

brown: H<sub>2</sub>, black: CO, green: CO<sub>2</sub>, grey: CH<sub>4</sub>. Due to the deactivation, the activity towards CO formation drops below the detection limit of the GC, rendering the determination of the CO<sub>2</sub> selectivity impossible. Sample mass: 40.1 mg.

## 7. Comparison with literature MSR catalysts in the same recirculating batch reactor

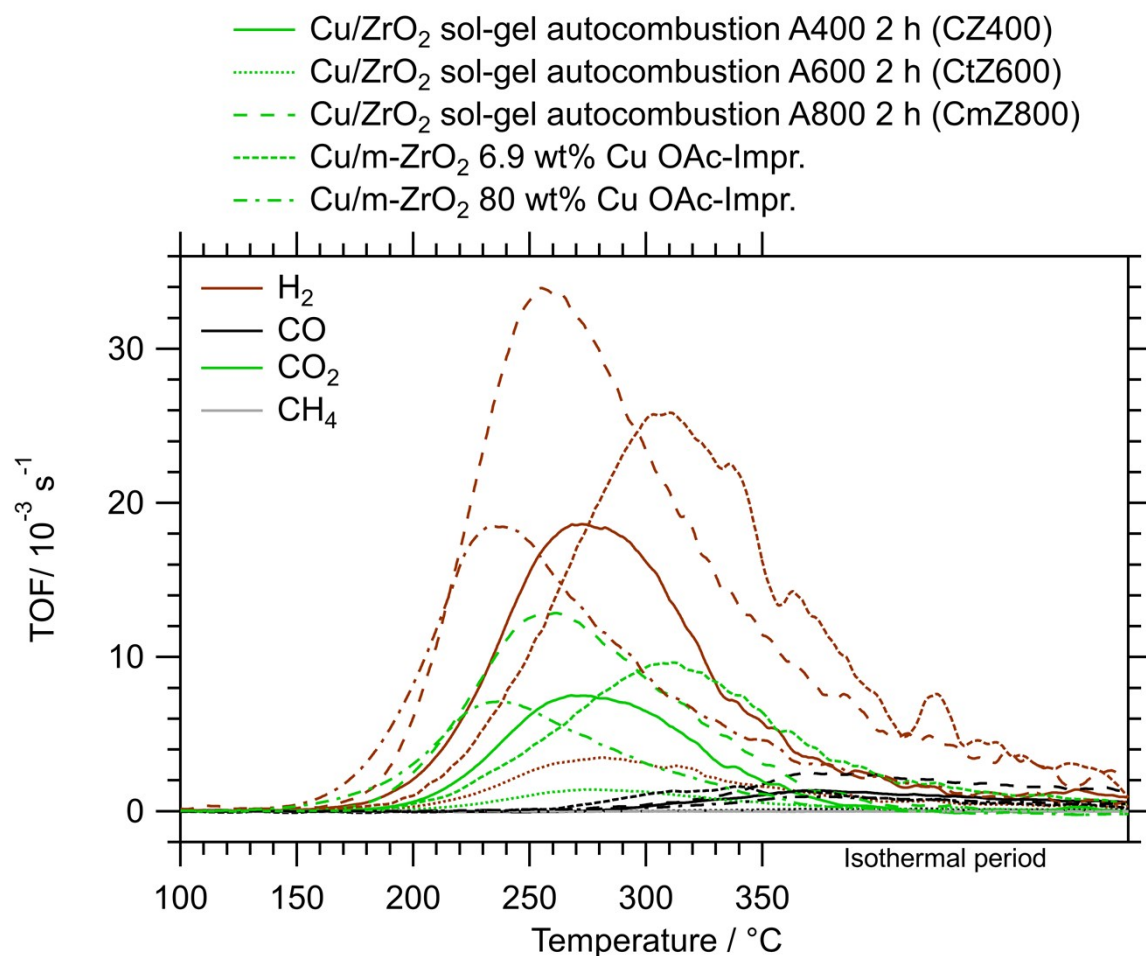

**Figure S12:** Comparison of CZ400, CtZ600 and CmZ800 with other Cu/ZrO<sub>2</sub> catalysts, one from literature<sup>12</sup> and one analogous system with a higher copper loading, measured in the same recirculating batch reactor setup under identical MSR conditions (100 °C-350 °C; isothermal period of 30 min; heating rate of 5 °C min<sup>-1</sup>). The turnover frequency was estimated according to the procedure described in section 1.2.

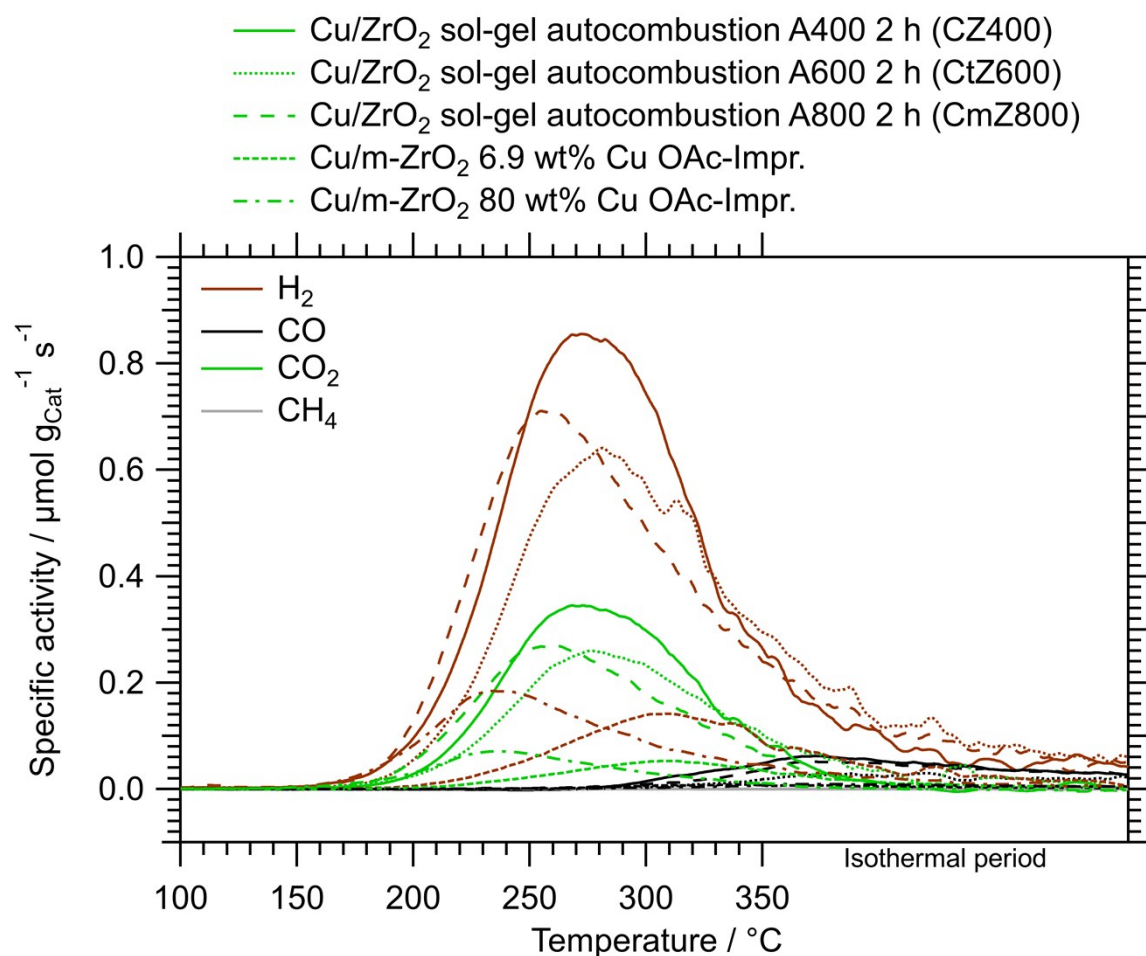

**Figure S13:** Comparison of CZ400, CtZ600 and CmZ800 with other Cu/ZrO<sub>2</sub> catalysts, one from literature<sup>12</sup> and one analogous system with a higher copper loading, measured in the same recirculating batch reactor setup under identical MSR conditions (100 °C-350 °C; isothermal period of 30 min; heating rate of 5 °C min<sup>-1</sup>). The rates are expressed in terms of the specific activity per g of catalyst (μmol g<sub>Cat</sub><sup>-1</sup> s<sup>-1</sup>).

## References

- 1 *WinX<sup>POW</sup>*, STOE & Cie GmbH, 2008.
- 2 *ICDD Database PDF-4+*, International Centre for Diffraction Data, Newtown Square, PA 19073, USA, 2010.
- 3 M. Behrens and M. Armbrüster, in *Catalysis for Alternative Energy Generation*, ed. L. Guczi and A. Erdöhelyi, Springer New York, New York, NY, 2012, pp. 175–235.
- 4 J. W. Evans, M. S. Wainwright, A. J. Bridgewater and D. J. Young, On the determination of copper surface area by reaction with nitrous oxide, *Appl. Catal.*, 1983, **7**, 75–83. DOI: 10.1016/0166-9834(83)80239-5.
- 5 *CasaXPS. Processing Software for XPS, AES, SIMS and More*, Casa Software Ltd.
- 6 W. H. Gries, A Universal Predictive Equation for the Inelastic Mean Free Pathlengths of X-ray Photoelectrons and Auger Electrons, *Surf. Interface Anal.*, 1996, **24**, 38–50. DOI: 10.1002/(SICI)1096-9918(199601)24:1<38::AID-SIA84>3.0.CO;2-H.
- 7 Y. Nishino, A. R. Krauss, Y. Lin and D. M. Gruen, Initial oxidation of zirconium and Zircaloy-2 with oxygen and water vapor at room temperature, *J. Nucl. Mater.*, 1996, **228**, 346–353. DOI: 10.1016/0022-3115(95)00194-8.
- 8 C. J. Howard, R. J. Hill and B. E. Reichert, Structures of ZrO<sub>2</sub> polymorphs at room temperature by high-resolution neutron powder diffraction, *Acta Crystallogr., Sec. B: Struct. Sci.*, 1988, **44**, 116–120. DOI: 10.1107/S0108768187010279.
- 9 H. Boysen, F. Frey and T. Vogt, Neutron powder investigation of the tetragonal to monoclinic phase transformation in undoped zirconia, *Acta Crystallogr., Sec. B: Struct. Sci.*, 1991, **47**, 881–886. DOI: 10.1107/S010876819100856X.
- 10 H. E. Swanson and E. Tatge, Standard X-ray diffraction patterns, *Natl. Bur. Stand.(US) Circ. 539*, 1953, **1**, 15.

- 11 S. Asbrink and A. Waskowska, CuO: X-ray single-crystal structure determination at 196 K and room temperature, *J. Phys.: Condens. Matter*, 1991, **3**, 8173–8180. DOI: 10.1088/0953-8984/3/42/012.
- 12 K. Ploner, M. Watschinger, P. Delir Kheyrollahi Nezhad, T. Götsch, L. Schlicker, E.-M. Köck, A. Gurlo, A. Gili, A. Doran, L. Zhang, N. Köwitsch, M. Armbrüster, S. Vanicek, W. Wallisch, C. Thurner, B. Klötzer and S. Penner, Mechanistic insights into the catalytic methanol steam reforming performance of Cu/ZrO<sub>2</sub> catalysts by *in situ* and *operando* studies, *J. Catal.*, 2020, **391**, 497–512. DOI: 10.1016/j.jcat.2020.09.018.
